# Supplementary material for: Endothelial Nox2 Limits Systemic Inflammation and Hypotension in Endotoxemia by Controlling Expression of Toll-Like Receptor 4
Source: PubMed Central journal article supplement — Shock. 2020 Dec 15;56(2):268–77. doi: 10.1097/SHK.0000000000001706 (PMC8284354; doi:10.1097/shk.0000000000001706), 2020-12-15
Supplement: shk-56-268-s001.pdf [file shk-56-268-s001.pdf]

## SUPPLEMENTAL DATA

### **Endothelial Nox2 limits systemic inflammation and hypotension in endotoxemia by controlling expression of toll-like receptor 4**

Silvia Cellone Trevelin<sup>1</sup>, Can Martin Sag<sup>2</sup>, Min Zhang<sup>1</sup>, José Carlos Alves-Filho<sup>3</sup>, Thiago Mattar Cunha<sup>3</sup>, Célio Xavier dos Santos<sup>1</sup>, Greta Sawyer<sup>1</sup>, Thomas Murray<sup>1</sup>, Alison Brewer<sup>1</sup>, Francisco Rafael Martins Laurindo<sup>4</sup>, Andrea Protti<sup>1</sup>, Lucia Rossetti Lopes<sup>5</sup>, Aleksandar Ivetic<sup>1</sup>, Fernando Queiroz Cunha<sup>2</sup>, Ajay M. Shah<sup>1\*</sup>.

<sup>1</sup>King's College London, British Heart Foundation Centre for Research Excellence, School of Cardiovascular Medicine & Sciences, London, United Kingdom; <sup>2</sup>Department of Internal Medicine II, University Hospital of Regensburg, Germany; <sup>3</sup>Department of Pharmacology, Ribeirao Preto Medical School, University of Sao Paulo, Ribeirao Preto, Brazil; <sup>4</sup>Heart Institute, School of Medicine, Sao Paulo, Brazil; <sup>5</sup>Department of Pharmacology, Institute of Biomedical Sciences, University of Sao Paulo, Sao Paulo, Brazil.

**\*Correspondence:** Prof. Ajay M Shah, M.D., King's British Heart Foundation Centre for Research Excellence, School of Cardiovascular Medicine and Sciences, King's College London, 125 Coldharbour Lane SE5 9NU, London, United Kingdom. Phone: +44 (0) 20 7848 5189. email: [ajay.shah@kcl.ac.uk](mailto:ajay.shah@kcl.ac.uk).

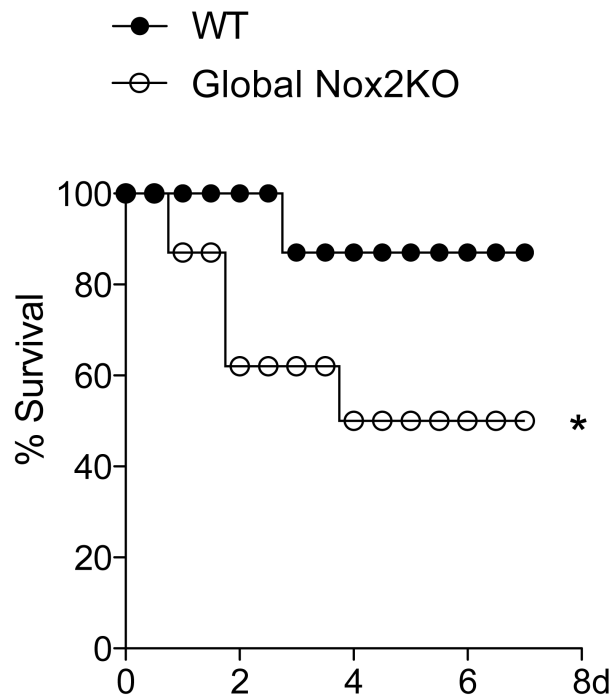

**Supplemental digital content 1.** Wild type (WT) and Nox2 deficient (Global Nox2KO) mice were injected with LPS (10 mg/kg i.v.). The survival rates were evaluated up to 7 days after challenge with LPS. Log-rank (Mantel-Cox) test.\*P<0.05 (n=8 per group).

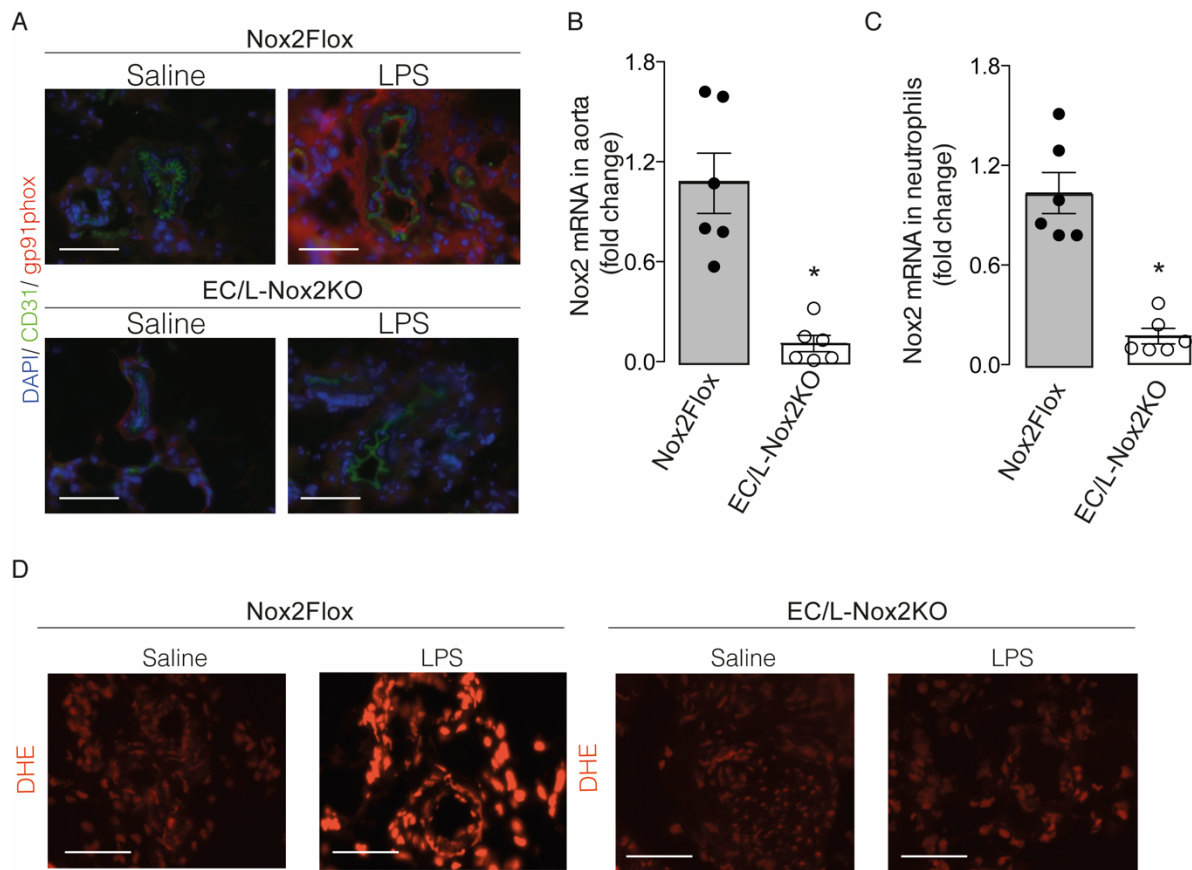

**Supplemental digital content 2. Tie2-targeted deletion of Nox2 reduces its expression in neutrophils and blood vessels.** (A-C) EC/L-Nox2KO mice and Nox2Flox (Nox2-replete) littermate control mice were treated intravenously with lipopolysaccharide (LPS, 10mg/kg) or phosphate buffered saline. (A) Nox2 (gp91phox, red) and CD31 (green) staining in mesenteric vessels, conducted 12 hours after LPS injection. Nuclei were stained with 4',6-diamino-2-phenylindole (DAPI, blue). Images were acquired in epifluorescence microscope. Scale bars, 50µm. Nox2 mRNA levels in aorta (B) and neutrophils purified from bone marrow (C). Data are mean ± SEM. \* $P < 0.05$  for highlighted comparisons (n=6 per group). Mann-Whitney test. (D) Dihydroethidium (DHE) staining in mesenteric vessels, 12 hours after LPS injection. Scale bars, 50µm. Images represent the results obtained from 3 mice per group.

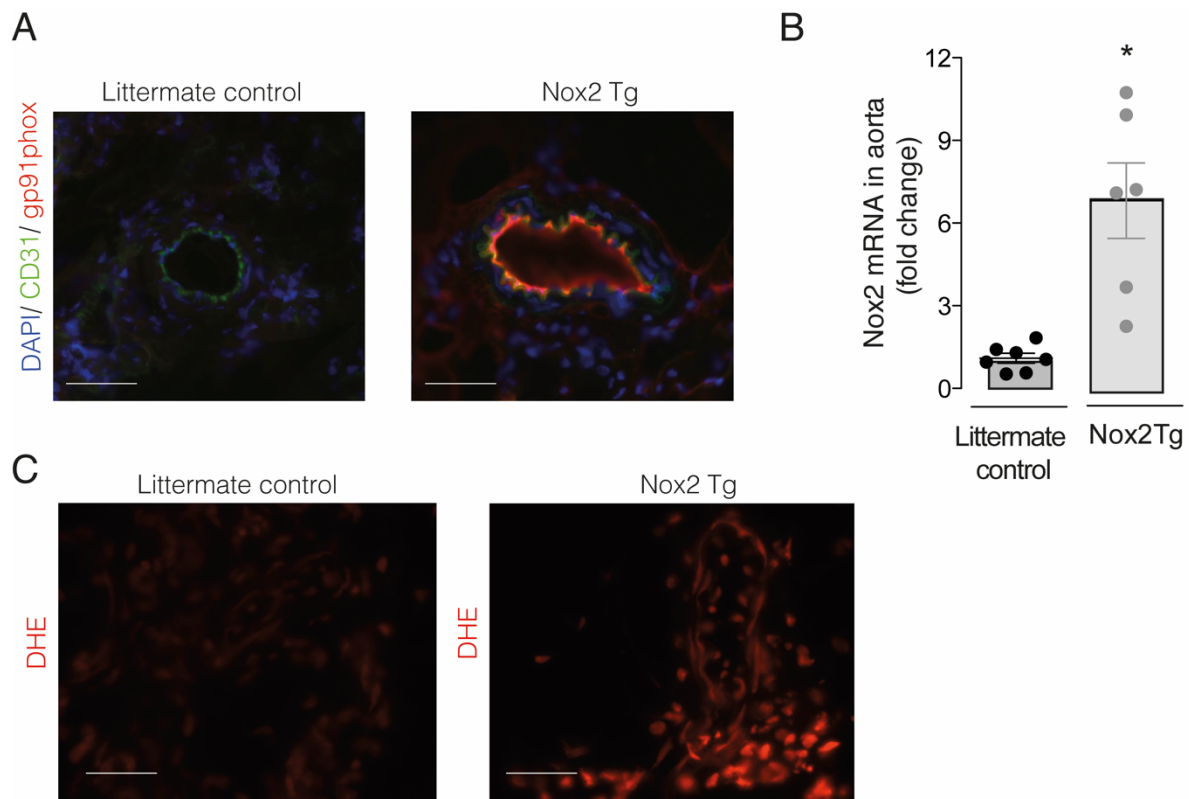

**Supplemental digital content 3. Tie2-targeting Nox2 overexpression enhances reactive oxygen species in mesenteric vessels.** (A) Nox2 expression in mesenteric vessels of Tie-2 targeted transgenic Nox2 mice (Nox2 Tg) and littermate control. Nox2 (gp91phox, red) and CD31 (green) staining in mesenteric vessels. Nuclei were stained with 4',6-diamino-2-phenylindole (DAPI, blue). Images were acquired in epifluorescence microscope. Scale bars, 50 $\mu$ m. Images represent the results obtained from 3 mice per group. (B) Levels of mRNA for Nox2 in aorta by qPCR. Graph represents mean  $\pm$  SEM. \* $P$ <0.05 (n=6-7 per group). Mann-Whitney test. (C) Dihydroethidium (DHE) staining in mesenteric vessels. Scale bars, 50 $\mu$ m.

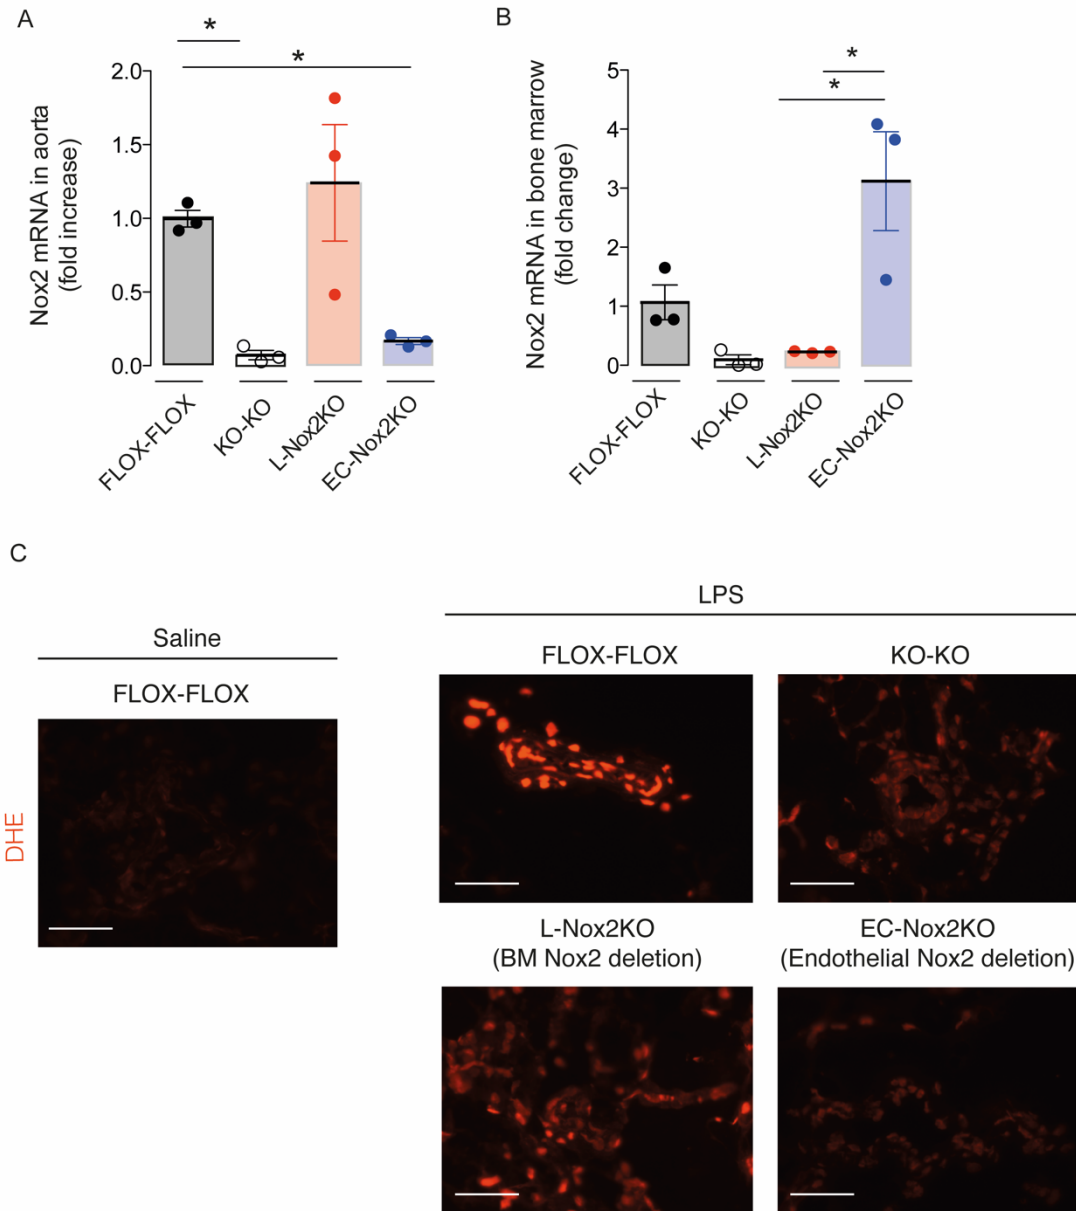

**Supplemental digital content 4. Generation of bone marrow (BM) chimeric mice.** BM chimeric mice with Nox2 deletion either in EC cells (EC-Nox2KO) or in BM cells (L-Nox2KO). KO-KO (Nox2 deficiency in EC and BM cells) and FLOX-FLOX (Nox2-replete) were used as negative and positive controls, respectively. Nox2 mRNA levels in aorta (A) and BM cells (B).  $*P < 0.05$  ( $n=3$  per group). (C) Dihydroethidium (DHE) staining, 12 hours after LPS iv injection (10mg/kg). Images were acquired in epifluorescence microscope. Scale bars, 50 $\mu$ m. Images represent the results obtained from 3 mice per group.

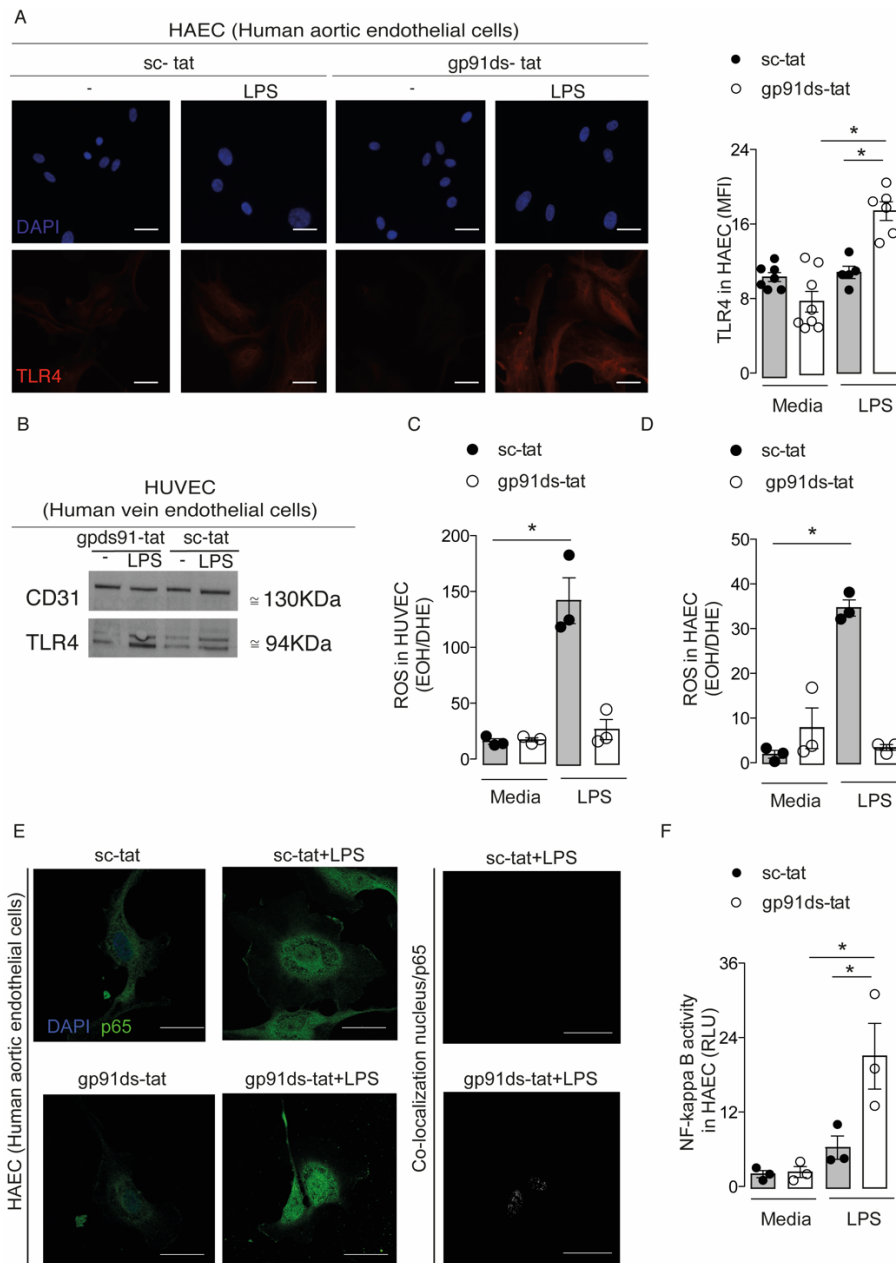

**Supplemental digital content 5. Nox2 inhibition by gp91ds-tat increases NF- $\kappa$ B activation and TLR4 expression in endothelial cells.** Human aortic or vein endothelial cells (HAEC and HUVEC, respectively) were pre-incubated with gp91ds-tat (30  $\mu$ M) or scrambled-tat (sc-tat, 30  $\mu$ M) for one hour and stimulated with lipopolysaccharide (LPS, 200 ng/ml). (A) Immunostaining for TLR4 (red stain), after 24 hours of LPS stimulation. Images were acquired by fluorescence microscopy. Nuclei were stained with 4',6-diamino-2-phenylindole (DAPI). Scale bars, 25 $\mu$ m. MFI: mean fluorescence intensity. Representative images on the left and mean data $\pm$ SEM on the right. (B) Immunoblotting for TLR4 in HUVEC after 24 hours of LPS stimulation. (C-D) Analyses of high performance liquid chromatography (HPLC) for superoxide-mediated dihydroethidium (DHE) oxidation product 2-hydroxyethidium (EOH). Cells were pre-incubated with the peptides gp91ds-tat (30 $\mu$ M) or scrambled-tat (sc-tat, 30 $\mu$ M) one hour before being stimulated 4 fours with LPS (200ng/ml). Graph is mean $\pm$ SEM. (E) Co-localization of p65 NF- $\kappa$ B subunit (green) in the nucleus (blue) of HAEC, 30 minutes after LPS stimulation. Images were acquired in a confocal microscopy. Nuclei were stained with 4',6-diamino-2-phenylindole (DAPI). Colocalization of nucleus and p65 is represented in white/black panels. Scale bars, 25 $\mu$ m. (F) Luciferase reporter assays for NF- $\kappa$ B activation after 24 hours of LPS stimulation. RLU: relative lumen units. Graphs represents mean $\pm$ SEM. \* $P$ <0.05 for highlighted comparisons. Kruskal-Wallis followed by Dunn's Multiple Comparison test (A, right panel; C, D, F).

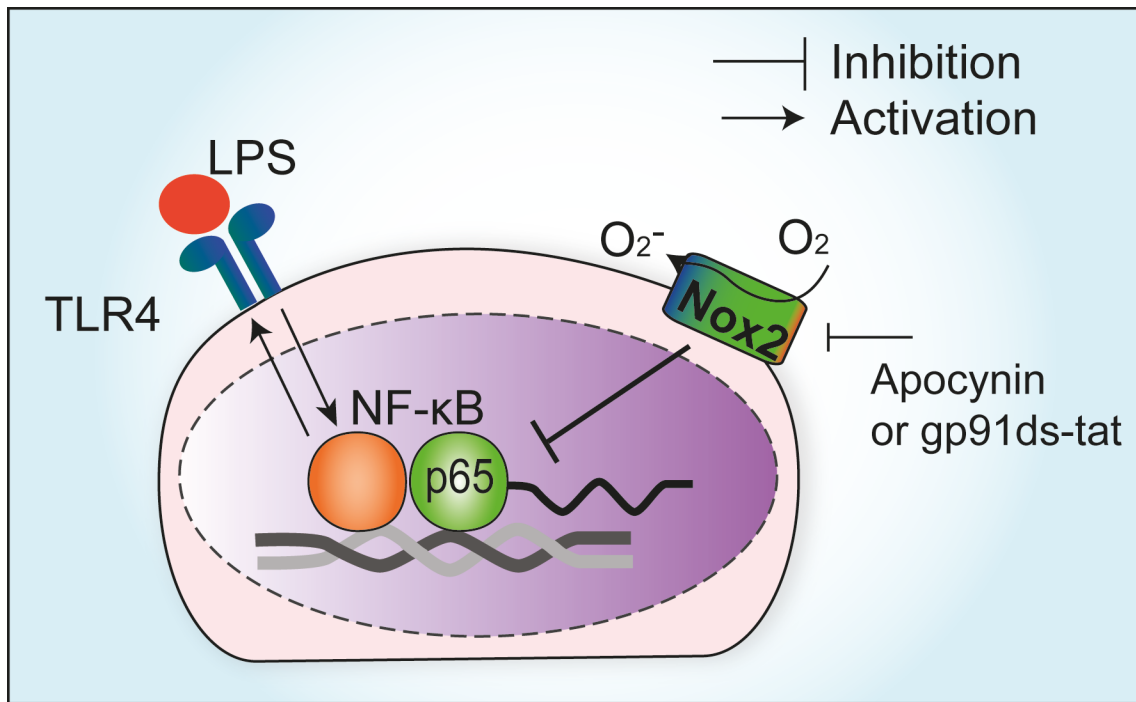

**Supplemental digital content 6. Nox2 in endothelial cells (EC) regulates systemic inflammation and hypotension in sepsis.** Schematic showing downregulation of NF-κB and TLR4 expression by Nox2 in endothelial cells, which may account for reduced multi-organ failure and death induced by lipopolysaccharide (LPS).
